# Supplementary material for: No-touch measurements of vital signs in small conscious animals
Source: PubMed Central journal article supplement — Sci Adv. 2019 Feb 13;5(2):eaau0169. doi: 10.1126/sciadv.aau0169 (PMC6374106; doi:10.1126/sciadv.aau0169), 2019-02-13
Supplement: aau0169_SM.pdf [file aau0169_SM.pdf]

[advances.sciencemag.org/cgi/content/full/5/2/eaau0169/DC1](https://advances.sciencemag.org/cgi/content/full/5/2/eaau0169/DC1)

## Supplementary Materials for

### **No-touch measurements of vital signs in small conscious animals**

Xiaonan Hui\* and Edwin C. Kan

\*Corresponding author. Email: [xh273@cornell.edu](mailto:xh273@cornell.edu)

Published 13 February 2019, *Sci. Adv.* **5**, eaau0169 (2019)  
DOI: [10.1126/sciadv.aau0169](https://doi.org/10.1126/sciadv.aau0169)

#### **The PDF file includes:**

Legend for movie S1

#### **Other Supplementary Material for this manuscript includes the following:**

(available at [advances.sciencemag.org/cgi/content/full/5/2/eaau0169/DC1](https://advances.sciencemag.org/cgi/content/full/5/2/eaau0169/DC1))

Movie S1 (.mp4 format). Real-time heartbeat and breath monitoring of the parakeet.

**Movie S1. Real-time heartbeat and breath monitoring of the parakeet.**
